# Supplementary material for: Structural Properties of Prokaryotic Promoter Regions Correlate with Functional Features
Source: PubMed Central journal article supplement (PMC3918002; doi:10.1371/journal.pone.0088717), 2014-02-07
Supplement: pone.0088717.s005.pdf [file pone.0088717.s005.pdf]

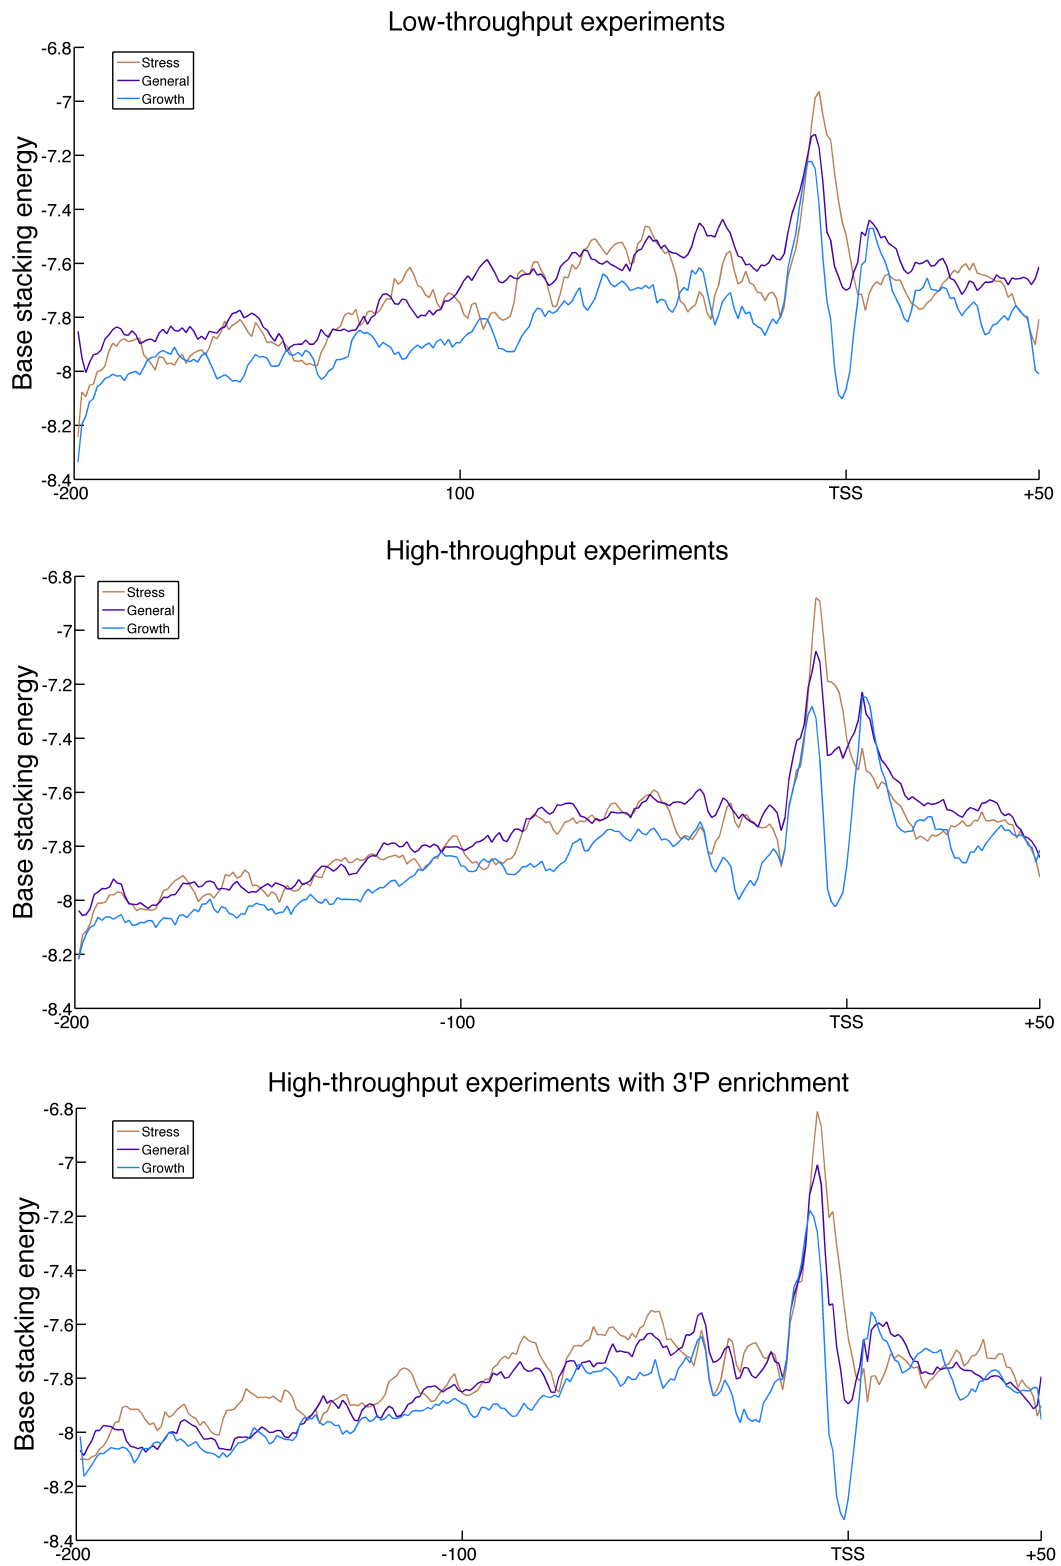

Supplemental figure 5: Average base stacking profiles of the three expression classes grouped by experimental method used to determine the TSS.
