# Supplementary material for: Structural Properties of Prokaryotic Promoter Regions Correlate with Functional Features
Source: PubMed Central journal article supplement (PMC3918002; doi:10.1371/journal.pone.0088717), 2014-02-07
Supplement: pone.0088717.s006.pdf [file pone.0088717.s006.pdf]

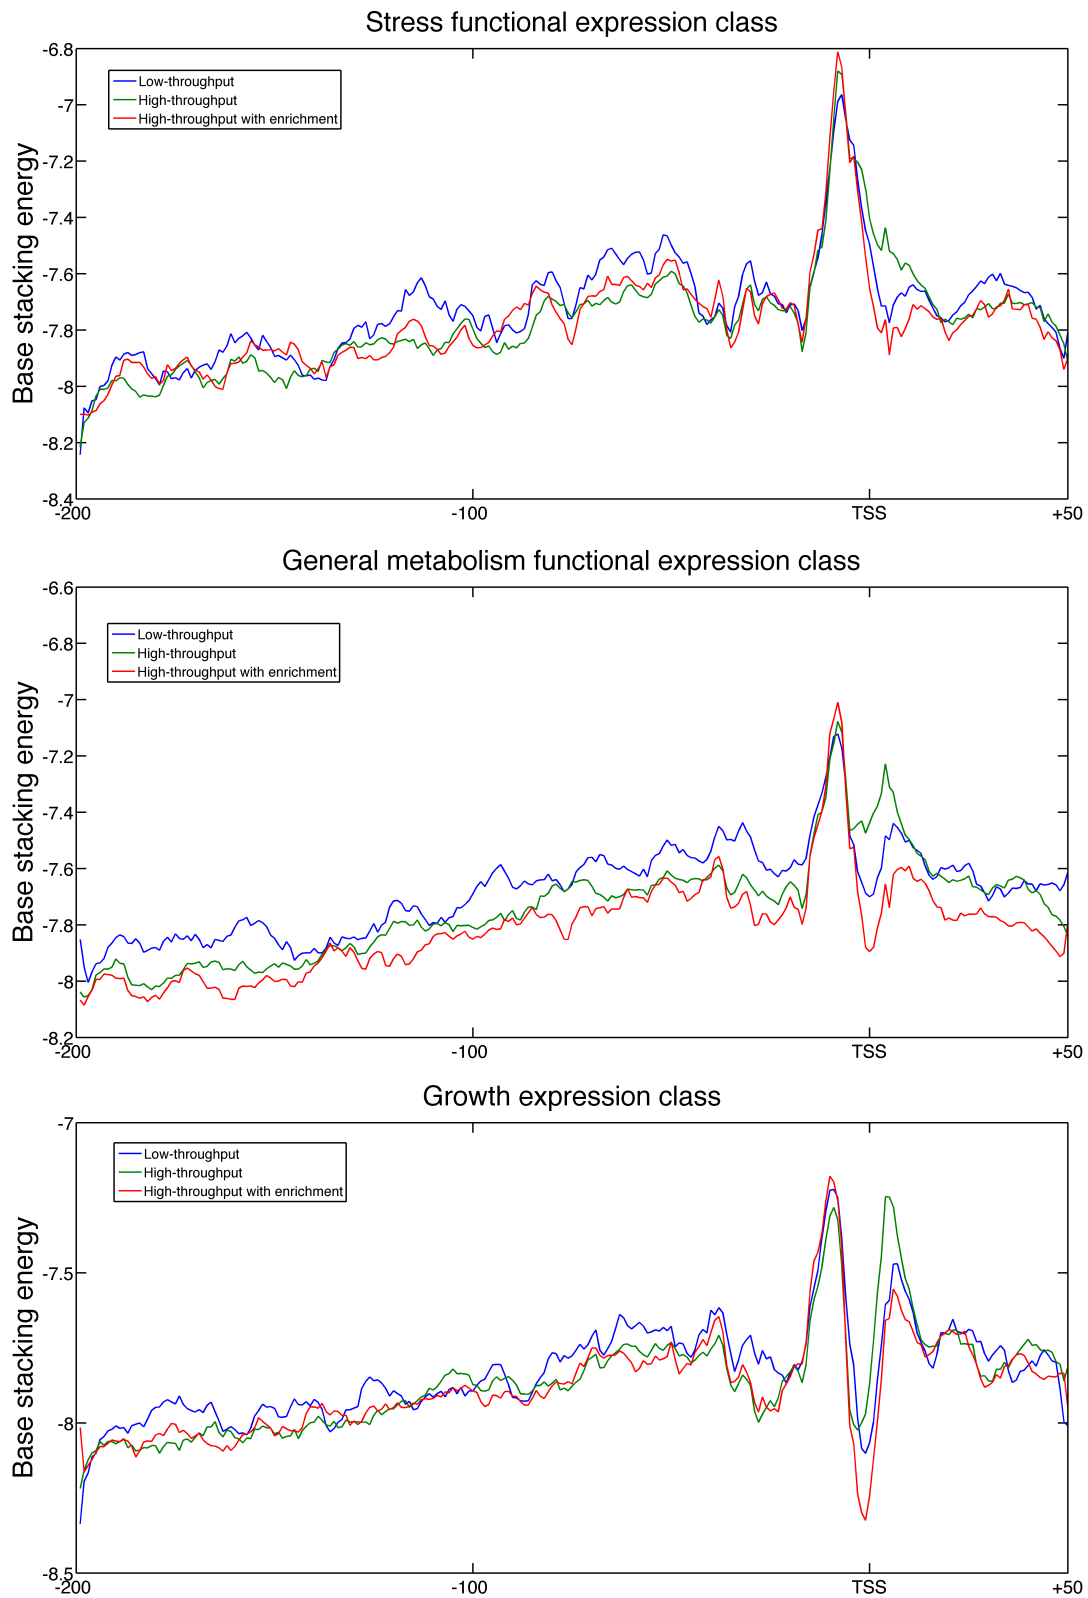

Supplemental figure S6: Average base stacking energy profiles of the three experimental categories used to determine the TSS location grouped by functional expression class.
