# Supplementary material for: Structural Properties of Prokaryotic Promoter Regions Correlate with Functional Features
Source: PubMed Central journal article supplement (PMC3918002; doi:10.1371/journal.pone.0088717), 2014-02-07
Supplement: pone.0088717.s008.pdf [file pone.0088717.s008.pdf]

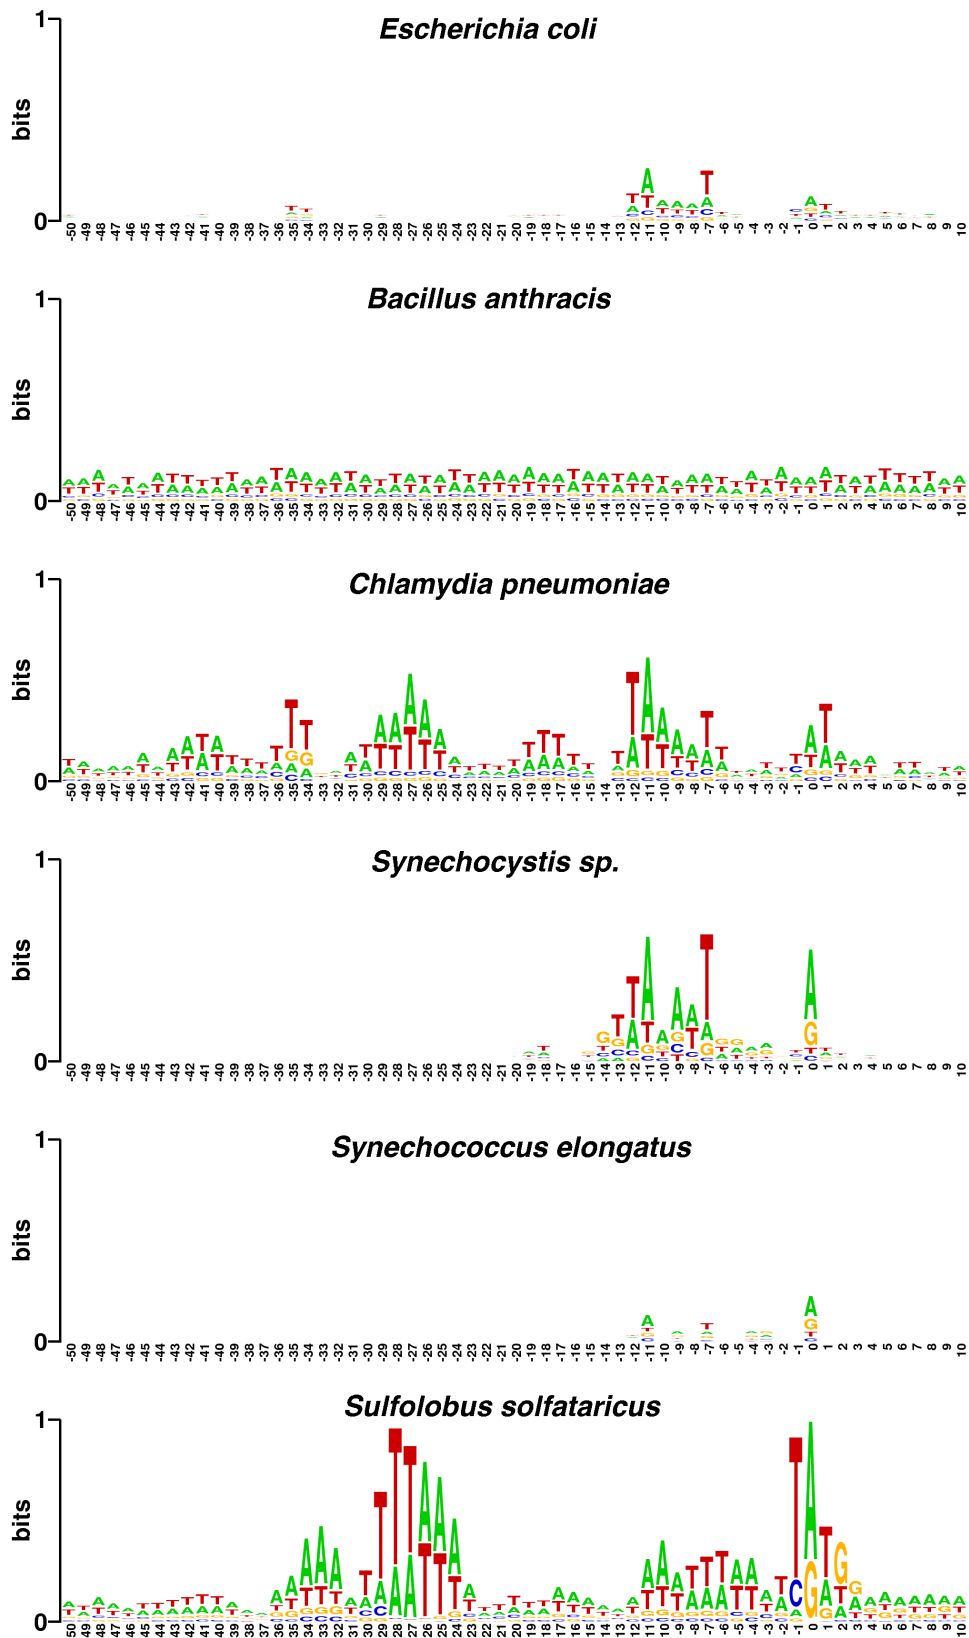

Supplemental figure S8: Motif logos generated with Weblogo of the promoter regions (50bp upstream to 10bp downstream of the TSS) for the six prokaryotes from different phyla.
