# Supplementary material for: Structural Properties of Prokaryotic Promoter Regions Correlate with Functional Features
Source: PubMed Central journal article supplement (PMC3918002; doi:10.1371/journal.pone.0088717), 2014-02-07
Supplement: pone.0088717.s009.pdf [file pone.0088717.s009.pdf]

## **Supplemental data S1: Gene ontology enrichment of the expression class genes**

Here we report the ontology enrichments for each of the three expression classes compared against the set of all genes for which we have expression data. A more detailed analysis on the function of these classes can be found in Meysman *et al.* (2013).

### **Gene ontology enrichments of the *E. coli* stress expression class genes**

organic substance catabolic process :  $2.11 \cdot 10^{-7}$  (110 of 394)  
cellular catabolic process :  $4.78 \cdot 10^{-8}$  (103 of 353)  
oxidation-reduction process :  $7.82 \cdot 10^{-8}$  (130 of 479)  
carbohydrate catabolic process :  $4.64 \cdot 10^{-7}$  (41 of 107)  
lipid modification :  $7.20538195616898 \cdot 10^{-5}$  (9 of 13)  
response to heat :  $6.05566537641835 \cdot 10^{-8}$  (20 of 33)  
response to reactive oxygen species :  $7.156 \cdot 10^{-5}$  (13 of 24)  
carboxylic acid catabolic process :  $3.533 \cdot 10^{-11}$  (57 of 136)  
fatty acid catabolic process :  $6.12 \cdot 10^{-6}$  (10 of 13)  
organic acid catabolic process :  $3.53 \cdot 10^{-11}$  (57 of 136)  
cellular lipid catabolic process :  $1.17 \cdot 10^{-5}$  (11 of 16)  
response to oxidative stress :  $1.01 \cdot 10^{-6}$  (25 of 53)  
single-organism carbohydrate catabolic process :  $2.47 \cdot 10^{-7}$  (38 of 94)  
small molecule catabolic process :  $2.19 \cdot 10^{-12}$  (69 of 171)  
succinate metabolic process :  $3.50 \cdot 10^{-5}$  (6 of 6)  
response to stress :  $1.08 \cdot 10^{-13}$  (89 of 236)  
fatty acid beta-oxidation :  $6.30 \cdot 10^{-6}$  (7 of 7)  
catabolic process :  $3.63 \cdot 10^{-8}$  (115 of 405)  
monocarboxylic acid catabolic process :  $3.95 \cdot 10^{-7}$  (29 of 64)  
cellular carbohydrate catabolic process :  $4.25 \cdot 10^{-6}$  (19 of 37)  
lipid catabolic process :  $1.91 \cdot 10^{-6}$  (13 of 19)  
response to stimulus :  $2.23 \cdot 10^{-6}$  (110 of 411)  
single-organism catabolic process :  $2.19 \cdot 10^{-12}$  (69 of 171)

### **Gene ontology enrichments of the *E. coli* general metabolism expression class genes**

transport :  $8.40 \cdot 10^{-12}$  (435 of 694)  
signal transduction :  $2.74 \cdot 10^{-5}$  (72 of 101)  
biological adhesion :  $1.74 \cdot 10^{-9}$  (44 of 48)  
cell adhesion :  $5.94 \cdot 10^{-8}$  (38 of 42)  
single-organism transport :  $1.53 \cdot 10^{-7}$  (271 of 431)  
anion transport :  $2.84 \cdot 10^{-5}$  (47 of 61)  
single-organism process :  $1.12 \cdot 10^{-6}$  (460 of 783)  
regulation of transcription, DNA-dependent :  $2.80 \cdot 10^{-5}$  (224 of 365)  
transmembrane transport :  $3.52 \cdot 10^{-5}$  (160 of 252)

### **Gene ontology enrichments of the *E. coli* growth expression class genes**

cellular lipid metabolic process :  $5.55 \cdot 10^{-8}$  (81 of 161)  
RNA modification :  $1.34 \cdot 10^{-11}$  (40 of 53)  
pyridine-containing compound biosynthetic process :  $1.75 \cdot 10^{-5}$  (15 of 19)  
carbohydrate derivative biosynthetic process :  $3.48 \cdot 10^{-16}$  (104 of 175)  
alpha-amino acid biosynthetic process :  $3.31 \cdot 10^{-8}$  (60 of 108)  
ribose phosphate metabolic process :  $4.04 \cdot 10^{-14}$  (37 of 43)  
RNA processing :  $2.28 \cdot 10^{-10}$  (43 of 62)

purine ribonucleoside monophosphate biosynthetic process :  $4.98 \cdot 10^{-9}$  (20 of 22)  
ribonucleoside monophosphate metabolic process :  $1.74 \cdot 10^{-12}$  (32 of 37)  
ribonucleotide metabolic process :  $6.52 \cdot 10^{-8}$  (82 of 164)  
heterocycle metabolic process :  $7.44 \cdot 10^{-15}$  (215 of 465)  
nucleobase-containing compound metabolic process :  $4.27 \cdot 10^{-20}$  (240 of 495)  
single-organism biosynthetic process :  $1.42 \cdot 10^{-18}$  (140 of 249)  
oligosaccharide biosynthetic process :  $5.03 \cdot 10^{-6}$  (28 of 44)  
purine nucleotide metabolic process :  $1.24 \cdot 10^{-5}$  (71 of 152)  
macromolecule modification :  $9.56 \cdot 10^{-6}$  (66 of 138)  
phosphate-containing compound metabolic process :  $6.67 \cdot 10^{-6}$  (203 of 524)  
cellular amino acid metabolic process :  $1.10 \cdot 10^{-8}$  (128 of 279)  
lipid metabolic process :  $2.52 \cdot 10^{-7}$  (82 of 168)  
ncRNA processing :  $2.01 \cdot 10^{-10}$  (36 of 48)  
tRNA aminoacylation :  $1.08 \cdot 10^{-9}$  (23 of 26)  
intracellular protein transport :  $1.87 \cdot 10^{-7}$  (13 of 13)  
Gram-negative-bacterium-type cell outer membrane assembly :  $6.75 \cdot 10^{-6}$  (10 of 10)  
pteridine-containing compound metabolic process :  $5.04 \cdot 10^{-5}$  (15 of 20)  
hydrogen transport :  $2.41 \cdot 10^{-7}$  (24 of 32)  
cellular biosynthetic process :  $5.59 \cdot 10^{-30}$  (284 of 552)  
cellular macromolecule biosynthetic process :  $8.96 \cdot 10^{-6}$  (54 of 107)  
cellular nitrogen compound biosynthetic process :  $1.06 \cdot 10^{-22}$  (157 of 271)  
purine ribonucleotide biosynthetic process :  $5.68 \cdot 10^{-11}$  (24 of 26)  
glycosyl compound biosynthetic process :  $9.49 \cdot 10^{-6}$  (28 of 45)  
ncRNA metabolic process :  $1.29 \cdot 10^{-17}$  (59 of 76)  
nucleoside biosynthetic process :  $9.49 \cdot 10^{-6}$  (28 of 45)  
sulfur compound biosynthetic process :  $6.01 \cdot 10^{-6}$  (35 of 60)  
ribose phosphate biosynthetic process :  $4.04 \cdot 10^{-14}$  (37 of 43)  
macromolecule metabolic process :  $1.11 \cdot 10^{-18}$  (212 of 430)  
heterocycle biosynthetic process :  $1.97 \cdot 10^{-19}$  (145 of 257)  
tetrahydrofolate metabolic process :  $1.02 \cdot 10^{-5}$  (13 of 15)  
lipopolysaccharide core region biosynthetic process :  $2.73 \cdot 10^{-8}$  (20 of 23)  
organophosphate biosynthetic process :  $7.52 \cdot 10^{-16}$  (112 of 195)  
purine nucleoside monophosphate metabolic process :  $4.98 \cdot 10^{-9}$  (20 of 22)  
O antigen biosynthetic process :  $2.23 \cdot 10^{-5}$  (9 of 9)  
thiamine diphosphate metabolic process :  $5.37 \cdot 10^{-5}$  (10 of 11)  
pyrimidine ribonucleotide metabolic process :  $2.92 \cdot 10^{-5}$  (12 of 14)  
membrane assembly :  $6.75 \cdot 10^{-6}$  (10 of 10)  
nucleobase-containing compound biosynthetic process :  $4.08 \cdot 10^{-14}$  (92 of 156)  
alpha-amino acid metabolic process :  $4.13 \cdot 10^{-5}$  (83 of 189)  
phosphorus metabolic process :  $1.91 \cdot 10^{-5}$  (206 of 540)  
membrane organization :  $2.04 \cdot 10^{-6}$  (11 of 11)  
monovalent inorganic cation transport :  $6.30 \cdot 10^{-7}$  (24 of 33)  
vitamin biosynthetic process :  $5.11 \cdot 10^{-10}$  (43 of 63)  
nucleotide metabolic process :  $1.07 \cdot 10^{-10}$  (127 of 261)  
translation :  $6.59 \cdot 10^{-43}$  (95 of 101)  
fatty acid biosynthetic process :  $2.94 \cdot 10^{-6}$  (18 of 23)  
cofactor metabolic process :  $5.64 \cdot 10^{-11}$  (71 of 121)  
purine-containing compound biosynthetic process :  $2.65 \cdot 10^{-7}$  (27 of 38)  
lipopolysaccharide core region metabolic process :  $2.73 \cdot 10^{-8}$  (20 of 23)  
carbohydrate biosynthetic process :  $7.43 \cdot 10^{-6}$  (64 of 132)  
cellular aromatic compound metabolic process :  $1.01 \cdot 10^{-9}$  (187 of 432)  
polysaccharide biosynthetic process :  $2.23 \cdot 10^{-5}$  (51 of 102)  
tRNA modification :  $1.60 \cdot 10^{-10}$  (34 of 44)  
purine nucleoside monophosphate biosynthetic process :  $4.98 \cdot 10^{-9}$  (20 of 22)  
lipopolysaccharide biosynthetic process :  $4.11 \cdot 10^{-6}$  (43 of 78)  
purine ribonucleotide metabolic process :  $1.78 \cdot 10^{-5}$  (69 of 148)  
pteridine-containing compound biosynthetic process :  $2.92 \cdot 10^{-5}$  (12 of 14)  
energy coupled proton transmembrane transport, against electrochemical gradient :  $2.23 \cdot 10^{-5}$   
(9 of 9)

lipid biosynthetic process :  $8.61 \cdot 10^{-10}$  (70 of 124)  
guanosine-containing compound metabolic process :  $1.50 \cdot 10^{-6}$  (22 of 30)  
coenzyme biosynthetic process :  $1.10 \cdot 10^{-11}$  (55 of 83)  
tRNA aminoacylation for protein translation :  $3.19 \cdot 10^{-9}$  (22 of 25)  
tRNA methylation :  $6.75 \cdot 10^{-6}$  (10 of 10)  
tRNA processing :  $5.07 \cdot 10^{-10}$  (35 of 47)  
ATP synthesis coupled proton transport :  $2.23 \cdot 10^{-5}$  (9 of 9)  
cellular macromolecule metabolic process :  $2.78 \cdot 10^{-20}$  (185 of 351)  
rRNA modification :  $3.69 \cdot 10^{-6}$  (22 of 31)  
pyrimidine nucleotide biosynthetic process :  $2.44 \cdot 10^{-6}$  (17 of 21)  
pyrimidine ribonucleotide biosynthetic process :  $2.93 \cdot 10^{-5}$  (12 of 14)  
water-soluble vitamin metabolic process :  $9.88 \cdot 10^{-8}$  (44 of 73)  
nucleoside phosphate biosynthetic process :  $8.11 \cdot 10^{-15}$  (71 of 107)  
protein peptidyl-prolyl isomerization :  $5.38 \cdot 10^{-5}$  (10 of 11)  
organic substance biosynthetic process :  $5.20 \cdot 10^{-32}$  (282 of 536)  
'de novo' IMP biosynthetic process :  $6.18 \cdot 10^{-7}$  (12 of 12)  
macromolecule methylation :  $1.50 \cdot 10^{-11}$  (34 of 42)  
ribonucleotide biosynthetic process :  $4.04 \cdot 10^{-15}$  (36 of 40)  
small molecule biosynthetic process :  $2.82 \cdot 10^{-18}$  (139 of 248)  
organophosphate metabolic process :  $6.51 \cdot 10^{-12}$  (170 of 366)  
cofactor biosynthetic process :  $4.71 \cdot 10^{-9}$  (60 of 104)  
pyrimidine ribonucleoside biosynthetic process :  $2.93 \cdot 10^{-5}$  (12 of 14)  
organic acid biosynthetic process :  $1.32 \cdot 10^{-11}$  (100 of 187)  
biosynthetic process :  $1.17 \cdot 10^{-29}$  (300 of 596)  
ribonucleoside monophosphate biosynthetic process :  $9.89 \cdot 10^{-13}$  (31 of 35)  
methylation :  $3.98 \cdot 10^{-11}$  (46 of 66)  
O antigen metabolic process :  $2.23 \cdot 10^{-5}$  (9 of 9)  
water-soluble vitamin biosynthetic process :  $5.11 \cdot 10^{-10}$  (43 of 63)  
rRNA base methylation :  $1.75 \cdot 10^{-5}$  (15 of 19)  
rRNA methylation :  $2.11 \cdot 10^{-5}$  (17 of 23)  
energy coupled proton transport, down electrochemical gradient :  $2.22 \cdot 10^{-5}$  (9 of 9)  
cellular polysaccharide biosynthetic process :  $2.68 \cdot 10^{-5}$  (50 of 100)  
lipopolysaccharide metabolic process :  $6.42 \cdot 10^{-6}$  (43 of 79)  
carboxylic acid biosynthetic process :  $1.32 \cdot 10^{-11}$  (100 of 187)  
RNA methylation :  $1.72 \cdot 10^{-9}$  (28 of 35)  
nucleotide biosynthetic process :  $8.11 \cdot 10^{-15}$  (71 of 107)  
organonitrogen compound biosynthetic process :  $6.66 \cdot 10^{-22}$  (173 of 313)  
organic substance metabolic process :  $1.87 \cdot 10^{-5}$  (405 of 1156)  
pyrimidine-containing compound biosynthetic process :  $1.10 \cdot 10^{-7}$  (28 of 39)  
cellular nitrogen compound metabolic process :  $1.39 \cdot 10^{-13}$  (239 of 542)  
macromolecule biosynthetic process :  $4.79 \cdot 10^{-8}$  (76 of 148)  
nucleoside monophosphate biosynthetic process :  $2.77 \cdot 10^{-12}$  (33 of 39)  
proton transport :  $2.41 \cdot 10^{-7}$  (24 of 32)  
tRNA metabolic process :  $3.43 \cdot 10^{-17}$  (58 of 75)  
rRNA processing :  $4.09 \cdot 10^{-8}$  (27 of 36)  
small molecule metabolic process :  $2.39 \cdot 10^{-5}$  (297 of 819)  
coenzyme metabolic process :  $5.39 \cdot 10^{-9}$  (65 of 116)  
purine nucleotide biosynthetic process :  $4.08 \cdot 10^{-11}$  (26 of 29)  
organic cyclic compound biosynthetic process :  $1.19 \cdot 10^{-19}$  (145 of 256)  
thiamine diphosphate biosynthetic process :  $5.38 \cdot 10^{-5}$  (10 of 11)  
aromatic compound biosynthetic process :  $1.03 \cdot 10^{-18}$  (125 of 213)  
carbohydrate derivative metabolic process :  $4.91 \cdot 10^{-11}$  (160 of 346)  
cellular amino acid biosynthetic process :  $1.53 \cdot 10^{-8}$  (82 of 160)  
cellular membrane organization :  $2.04 \cdot 10^{-6}$  (11 of 11)  
folic acid-containing compound biosynthetic process :  $2.92 \cdot 10^{-5}$  (12 of 14)  
ribonucleoside biosynthetic process :  $2.57 \cdot 10^{-6}$  (28 of 43)  
pyrimidine nucleotide metabolic process :  $2.44 \cdot 10^{-6}$  (17 of 21)  
amino acid activation :  $5.20 \cdot 10^{-9}$  (23 of 27)  
nucleoside monophosphate metabolic process :  $4.03 \cdot 10^{-12}$  (34 of 41)

organonitrogen compound metabolic process :  $1.36 \cdot 10^{-11}$  (244 of 575)  
purine ribonucleoside monophosphate metabolic process :  $4.98 \cdot 10^{-9}$  (20 of 22)  
IMP metabolic process :  $1.70 \cdot 10^{-8}$  (15 of 15)  
nucleoside phosphate metabolic process :  $1.48 \cdot 10^{-10}$  (127 of 262)  
organic cyclic compound metabolic process :  $4.88 \cdot 10^{-11}$  (215 of 498)  
RNA metabolic process :  $7.11 \cdot 10^{-17}$  (83 of 126)  
dicarboxylic acid biosynthetic process :  $6.15 \cdot 10^{-7}$  (27 of 39)  
nucleic acid metabolic process :  $3.04 \cdot 10^{-15}$  (101 of 172)  
IMP biosynthetic process :  $1.70 \cdot 10^{-8}$  (15 of 15)  
vitamin metabolic process :  $9.88 \cdot 10^{-8}$  (44 of 73)  
nucleobase-containing small molecule metabolic process :  $1.73 \cdot 10^{-7}$  (139 of 320)  
nitrogen compound metabolic process :  $1.05 \cdot 10^{-11}$  (295 of 722)  
peptidyl-proline modification :  $5.38 \cdot 10^{-5}$  (10 of 11)
